# Supplementary material
Source: PubMed Central journal article supplement (PMC5075979)
Supplement: supp_WNL.0000000000003176_Supplemental_data.pdf [file supp_WNL.0000000000003176_Supplemental_data.pdf]

**Figure e-1. Schematic of subjects meeting inclusion/exclusion criteria (N each)**

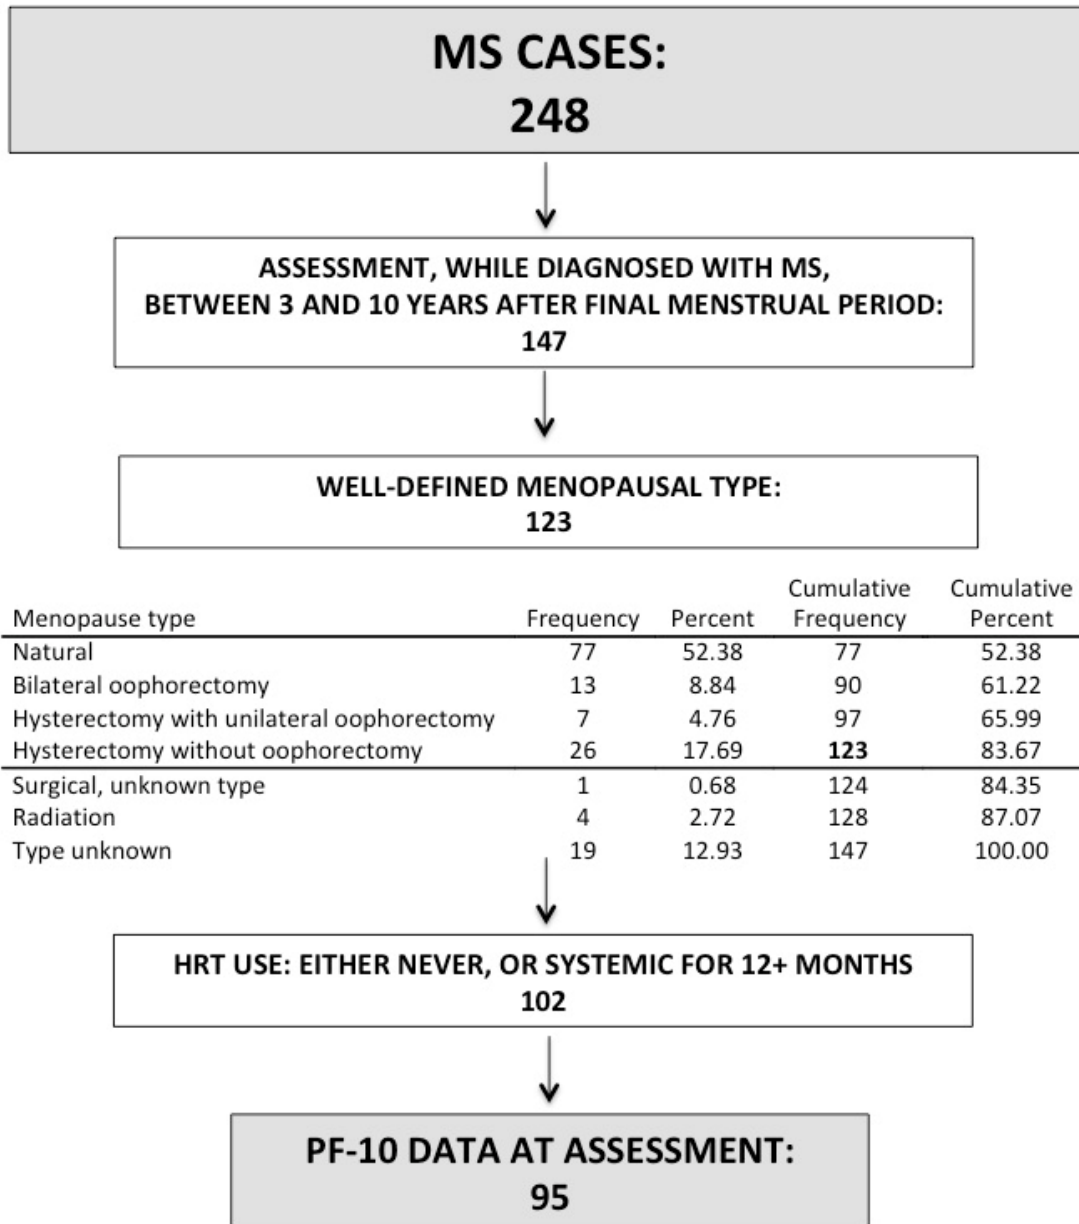

| Variable                                       | N  | Mean  | Miss |
|------------------------------------------------|----|-------|------|
| PF-10 physical functioning index (0-100)       | 95 | 48.25 | 7    |
| BP pain index (0-100)                          | 77 | 65.88 | 25   |
| GH general health perceptions (0-100)          | 77 | 55.14 | 25   |
| MCS standardized mental health component scale | 59 | 52.25 | 43   |
| MH mental health index (0-100)                 | 77 | 75.14 | 25   |
| PCS standardized physical component scale      | 59 | 34.44 | 43   |
| RE role emotional (0-100)                      | 77 | 71.87 | 25   |
| RP role physical (0-100)                       | 77 | 39.61 | 25   |
| SF social functioning (0-100)                  | 77 | 70.62 | 25   |
| VT vitality index (0-100)                      | 77 | 44.28 | 25   |

**Table e-1. Comparison of NHS subjects with MS with data fulfilling inclusion criteria and included in the PF10 analyses, versus individuals not in the PF10 analyses.**

|                                                        | Not included<br>N=42-148 | Included<br>N=89-95 | p-value      | N=0        | N=1       |
|--------------------------------------------------------|--------------------------|---------------------|--------------|------------|-----------|
| Age (years)*                                           | 56.1 (3.0)               | 56.5 (3.7)          | 0.49         | 52         | 95        |
| BMI (kg/m <sup>2</sup> )*                              | 25.8 (5.0)               | 26.0 (5.2)          | 0.74         | 50         | 90        |
| Smoking (pack-years)*                                  | <b>18.0 (17.9)</b>       | <b>11.6 (15.7)</b>  | <b>0.03</b>  | <b>52</b>  | <b>93</b> |
| MS duration (years)*                                   | 9.4 (6.9)                | 9.2 (6.1)           | 0.89         | 52         | 95        |
| BMI age 18 (kg/m <sup>2</sup> )*                       | 21.6 (3.0)               | 22.2 (3.2)          | 0.16         | 129        | 89        |
| Vitamin D intake (IU/day)*                             | 250.5 (361.9)            | 235.4 (248.4)       | 0.81         | 42         | 92        |
| Ancestry                                               |                          |                     |              |            |           |
| <i>Caucasian - other (%)</i>                           | 54.0                     | 61.0                | 0.28         | 148        | 95        |
| <i>Southern European (%)</i>                           | 13.5                     | 12.6                | 0.84         | 148        | 95        |
| <i>Scandinavian (%)</i>                                | 6.1                      | 5.3                 | 0.79         | 148        | 95        |
| <i>Other (%)</i>                                       | 26.4                     | 21.1                | 0.35         | 148        | 95        |
| Latitude of residence at age 15                        |                          |                     |              |            |           |
| <i>North (%)</i>                                       | 45.3                     | 44.2                | 0.87         | 148        | 95        |
| <i>Middle (%)</i>                                      | 37.2                     | 40.0                | 0.66         | 148        | 95        |
| <i>South (%)</i>                                       | 2.0                      | 7.4                 | <b>0.04</b>  | <b>148</b> | <b>95</b> |
| <i>Missing (%)</i>                                     | 15.5                     | 8.4                 | 0.1          | 148        | 95        |
| Premenopausal physical activity (METs/week)            | 9.9 (12.6)               | 8.8 (11.2)          | 0.62         | 40         | 90        |
| Time since menopause (years)                           | 5.8 (1.8)                | 6.1 (1.9)           | 0.46         | 52         | 95        |
| Menopause type                                         |                          |                     |              |            |           |
| <i>Natural (%)</i>                                     | 45.8                     | 63.2                | <b>0.008</b> | 153        | 95        |
| <i>Bilateral oophorectomy (%)</i>                      | 21.6                     | 10.5                | <b>0.03</b>  | <b>153</b> | <b>95</b> |
| <i>Other surgical (unilateral/no oophorectomy) (%)</i> | 13.1                     | 26.3                | <b>0.009</b> | <b>153</b> | <b>95</b> |
| Current HT user**                                      | 62.5                     | 64.2                | 0.88         | 24         | 95        |

\*At first post-menopausal assessment. Values are means (SD) or percentages and are standardized to the age distribution of the study population.

\*\*HT use was categorized as systemic, estrogen based, for at least 12 months, vs. never use.

**Table e-2. Full set of outcomes and covariates**

|                      | PF    |              | PCS   |             | BP    |         | GH    |         | MH    |         | RE    |         | RP    |         | SF    |         | VT    |         | MCS   |         |
|----------------------|-------|--------------|-------|-------------|-------|---------|-------|---------|-------|---------|-------|---------|-------|---------|-------|---------|-------|---------|-------|---------|
|                      | N=95  |              | N=59  |             | N=77  |         | N=77  |         | N=77  |         | N=77  |         | N=77  |         | N=77  |         | N=77  |         | N=59  |         |
|                      | β Est | p-value      | β Est | P-value     | β Est | p-value | β Est | p-value | β Est | p-value | β Est | p-value | β Est | p-value | β Est | p-value | β Est | p-value | β Est | P-value |
| <b>HT USE*</b>       |       |              |       |             |       |         |       |         |       |         |       |         |       |         |       |         |       |         |       |         |
| age adjusted         | 17.8  | <b>0.015</b> | 6.2   | 0.08        | -4.4  | 0.46    | -2.4  | 0.69    | -4.3  | 0.34    | -11.4 | 0.22    | 0.7   | 0.94    | 6.5   | 0.36    | 3.2   | 0.57    | -2.3  | 0.38    |
| base                 | 20.0  | <b>0.01</b>  | 8.2   | <b>0.04</b> | -5.8  | 0.35    | -0.4  | 0.95    | -6.1  | 0.22    | -8.0  | 0.42    | -0.6  | 0.95    | 6.0   | 0.42    | 1.1   | 0.85    | -2.4  | 0.42    |
| base + BMI           | 18.5  | <b>0.02</b>  | 6.8   | 0.10        | -9.2  | 0.14    | -4.1  | 0.50    | -6.7  | 0.19    | -11.9 | 0.23    | -8.2  | 0.43    | 1.1   | 0.88    | -2.5  | 0.67    | -3.0  | 0.33    |
| base + packyears     | 21.8  | <b>0.008</b> | 8.4   | <b>0.04</b> | -5.6  | 0.38    | -3.4  | 0.60    | -5.6  | 0.27    | -6.4  | 0.53    | 1.2   | 0.92    | 5.7   | 0.46    | -0.0  | 1.00    | -3.0  | 0.35    |
| base + ancestry      | 23.2  | <b>0.004</b> | 9.1   | <b>0.02</b> | -3.7  | 0.56    | 0.8   | 0.90    | -4.7  | 0.36    | -4.5  | 0.65    | 5.1   | 0.65    | 10.8  | 0.15    | 3.9   | 0.53    | -1.1  | 0.72    |
| base + region        | 21.1  | <b>0.009</b> | 8.0   | 0.06        | -6.7  | 0.29    | 1.3   | 0.84    | -6.7  | 0.18    | -5.2  | 0.60    | 1.1   | 0.93    | 7.5   | 0.33    | 2.2   | 0.73    | -1.9  | 0.54    |
| base + BMI18         | 20.0  | <b>0.01</b>  | 8.1   | 0.05        | -6.1  | 0.35    | -1.0  | 0.87    | -6.8  | 0.18    | -9.2  | 0.36    | -0.4  | 0.97    | 5.1   | 0.51    | -0.3  | 0.96    | -2.5  | 0.42    |
| base + Vitamin d     | 21.2  | <b>0.009</b> | 9.7   | <b>0.02</b> | -3.7  | 0.55    | 1.1   | 0.86    | -5.4  | 0.28    | -5.8  | 0.56    | 2.2   | 0.85    | 7.3   | 0.33    | 2.2   | 0.72    | -3.1  | 0.30    |
| base + METS          | 21.3  | <b>0.01</b>  | 8.2   | <b>0.05</b> | -6.2  | 0.33    | 0.1   | 0.98    | -5.7  | 0.25    | -9.1  | 0.36    | -1.1  | 0.92    | 5.2   | 0.49    | 0.6   | 0.92    | -3.5  | 0.24    |
| <b>HT DURATION**</b> |       |              |       |             |       |         |       |         |       |         |       |         |       |         |       |         |       |         |       |         |
| age adjusted         | 0.2   | <b>0.02</b>  | 0.1   | 0.07        | 0.02  | 0.77    | 0.03  | 0.65    | -0.03 | 0.59    | -0.1  | 0.39    | 0.003 | 0.98    | 0.07  | 0.44    | 0.02  | 0.79    | -0.02 | 0.55    |
| base                 | 0.2   | 0.06         | 0.1   | 0.06        | -0.01 | 0.89    | 0.02  | 0.80    | -0.05 | 0.43    | -0.1  | 0.50    | -0.02 | 0.88    | 0.05  | 0.62    | -0.04 | 0.64    | 0.00  | 0.95    |
| base + BMI           | 0.2   | 0.10         | 0.1   | 0.16        | -0.05 | 0.57    | -0.02 | 0.81    | -0.06 | 0.42    | -0.1  | 0.32    | -0.1  | 0.43    | -0.01 | 0.95    | -0.08 | 0.31    | -0.01 | 0.82    |
| base + packyears     | 0.2   | <b>0.05</b>  | 0.1   | 0.10        | -0.02 | 0.81    | -0.03 | 0.75    | -0.05 | 0.44    | -0.08 | 0.56    | 0.00  | 1.00    | 0.02  | 0.82    | -0.06 | 0.50    | -0.01 | 0.90    |
| base + ancestry      | 0.2   | 0.06         | 0.1   | 0.10        | 0.00  | 0.96    | 0.02  | 0.82    | -0.03 | 0.64    | -0.07 | 0.60    | 0.01  | 0.95    | 0.08  | 0.46    | -0.02 | 0.79    | 0.02  | 0.73    |
| base + region        | 0.2   | <b>0.05</b>  | 0.1   | 0.13        | -0.03 | 0.75    | 0.04  | 0.64    | -0.07 | 0.31    | -0.08 | 0.57    | -0.01 | 0.93    | 0.05  | 0.61    | -0.04 | 0.63    | -0.01 | 0.90    |
| base + BMI18         | 0.2   | 0.06         | 0.1   | 0.07        | -0.01 | 0.89    | 0.02  | 0.83    | -0.06 | 0.41    | -0.10 | 0.48    | -0.02 | 0.91    | 0.05  | 0.67    | -0.05 | 0.56    | 0.00  | 0.96    |
| base + Vitamin d     | 0.2   | <b>0.05</b>  | 0.1   | <b>0.05</b> | 0.01  | 0.91    | 0.05  | 0.59    | -0.04 | 0.58    | -0.05 | 0.71    | 0.01  | 0.96    | 0.08  | 0.45    | -0.02 | 0.79    | 0.00  | 0.99    |
| base + METS          | 0.2   | <b>0.05</b>  | 0.1   | 0.08        | -0.02 | 0.86    | 0.03  | 0.70    | -0.04 | 0.56    | -0.09 | 0.53    | -0.01 | 0.92    | 0.06  | 0.59    | -0.03 | 0.74    | -0.01 | 0.84    |

Base Model: Generalized linear regression adjusted for age, MS duration, time since menopause, and menopause type. Additional models adjusted for BMI (body mass index), smoking (packyears), ancestry, latitude of residence at age 15, BMI at age 18, supplemental vitamin D intake, and METS.

**SF-36 subscales:** BP (bodily pain), GH (general health perceptions), MH (mental health), RE (emotional role functioning), RP (physical role functioning), SF (social role functioning), VT (vitality), PF (physical function), MCS (mental composite score), PCS (physical composite score).

\* HT use was categorized as systemic, estrogen based, for at least 12 months, vs. never use. The estimate provided represents the increase in physical function measure observed if HT use = 1.

\*\* HT use was measured continuously in months. The estimate provided represents the increase in physical function measure observed for each additional month of systemic, estrogen based, HT use. To obtain the estimate of effect over 1-year, multiply the beta-estimate by 12.

**Table e-3. Association between HT use\* and PF10 at first postmenopausal assessment in women without an MS diagnosis.**

|                                                   | <b>NATURAL + SURGICAL MENOPAUSE</b> |                                    |                  |
|---------------------------------------------------|-------------------------------------|------------------------------------|------------------|
|                                                   | <b>N</b>                            | <b><math>\beta</math> Estimate</b> | <b>p-value</b>   |
| Model 1 (age-adjusted)                            | 31,935                              | 0.5                                | <b>0.02</b>      |
| Model 2 (adjusted for age and menopausal factors) | 31,935                              | 1.0                                | <b>&lt;.0001</b> |
| Model 3 (fully adjusted)                          | 31,935                              | -0.8                               | <b>0.0003</b>    |

Models: Generalized linear regression.

Model 1: adjusted for age.

Model 2: adjusted for age, time since menopause, and menopause type (natural, bilateral oophorectomy, other surgical).

Model 3: adjusted for Model 2 + *as well as*: ancestry, pack-years of smoking, vitamin D intake, BMI at PF10, BMI age 18, latitude age 15, and premenopausal physical activity.

\* HT use was categorized as systemic, estrogen based, for at least 12 months, vs. never use. The estimate provided represents the increase in PF10 observed if HT use = 1.
